# Supplementary material for: Single nucleotide variant discrimination by toehold exchange spherical nucleic acids modulated on hierarchical molybdenum disulfide acanthospheres
Source: Royal Society of Chemistry journal article supplement (doi:10.1039/d0cc03425h), 2020-01-01
Supplement: d0cc03425h1.pdf [file d0cc03425h1.pdf]

## **Supplementary Information for**

# **Single Nucleotide Variant Discrimination by Toehold Exchange Spherical Nucleic Acids Modulated on Hierarchical Molybdenum Disulfide Acanthosphere**

Min Zhu,<sup>a</sup> Yanyan Yu,<sup>\*a</sup> Junfeng Zhu,<sup>a</sup> Yao Zhou,<sup>a</sup> Gaoxing Su,<sup>a</sup> Hongyan Zhu,<sup>a</sup>  
Yong Chen<sup>a</sup> and Mingkai Liu<sup>\*bc</sup>

<sup>a</sup> *School of Pharmacy, Nantong University, Nantong, Jiangsu 226001, China*

*E-mail: yuyanyan@ntu.edu.cn*

<sup>b</sup> *School of Chemistry and Chemical Engineering, Jiangsu Key Laboratory of Green<sup>c</sup>  
Synthetic Chemistry for Functional Materials, Jiangsu Normal University, Xuzhou,  
Jiangsu 221116, China*

<sup>c</sup> *The Wallace H. Coulter Department of Biomedical Engineering, Georgia Institute  
of Technology and Emory University, Atlanta, Georgia 30332, United States*

*E-mail: liumingkai@jsnu.edu.cn; liu.mingkai@bme.gatech.edu*

## Experimental details

*Materials and Reagents:* Hexaammonium heptamolybdate tetrahydrate  $((\text{NH}_4)_6\text{Mo}_7\text{O}_{24}\cdot 4\text{H}_2\text{O})$  and thiourea were purchased from Sigma-Aldrich. Surfactant polyvinylpyrrolidone (PVP,  $M_w = 55000$ ) was obtained from Energy Chemical company (China). Oligonucleotides used (Table S1) were obtained from Sangon Biotech Co., Ltd (Shanghai, China) and with HPLC purification. All nucleic acid stock samples (100  $\mu\text{M}$ ) used were dissolved in ultrapure water. DNA sequences (Table S1) were designed with the help of Integrated DNA Technologies (IDT). Exo III (*E. coli*) and 10 $\times$ NEBuffer™ 1 were purchased from New England Biolabs (China). Tris-acetic acid-magnesium (1 $\times$ TAMg) buffer (45 mM Tris-acetic acid and 7.6 mM magnesium acetate, pH 8.0) was used for all nucleic acids self-assemblies. All reagents were used as received without further purification. Healthy human serum was supplied by the Affiliated Hospital of Nantong University.

*Methods and Apparatus:* Oligonucleotide quantification was carried out using UV1800PC spectrophotometer (Shanghai, China). Fluorescence signals were recorded on a RF-5301PC (Shimadzu) spectrofluorophotometer at ambient temperature. For all measurements the fluorescence intensities were recorded at 517 nm with an excitation wavelength of 485 nm. Centrifugea (Microfuge® 20, BECKMAN, USA) was used to precipitate nucleic acids modified MoS<sub>2</sub>. The DNA probes were annealed on an Applied Biosystems 96-well thermocycler. Syngene gel imaging system was used to image native polyacrylamide gel electrophoresis (PAGE) under UV light. The morphology of the MoS<sub>2</sub> superstructure was studied by a field-

emission scanning electron microscopy (FESEM, Hitachi, SU8010). Transmission electron microscopy (TEM) images were observed using a FEI Tecnai G2 F20. X-ray photoelectron spectra (XPS) were produced on a Thermo escalab 250Xi instrument equipped with an Al K $\alpha$  source ( $h\nu = 1486.6$  eV). X-ray diffraction (XRD) characterization of MoS<sub>2</sub> superstructure was carried out on a Bruker D8 Advance with a Cu K $\alpha$  radiation ( $\lambda_{\text{Cu K}\alpha}$  1.5418 Å).

*Native PAGE analysis:* All the oligonucleotides and reaction results were analyzed with 8% native PAGE. The electrophoresis was conducted in 1 × TBE buffer (89 mM Tris, 89 mM boric acid, 2 mM EDTA, pH 8.0). A constant voltage of 100 V was used for 1.5 h of electrophoresis before the gels were stained with 4S Red for imaging. And the strength of the band was calculated based on the gray scale of the PAGE image with software Image J.

*The synthesis of the MoS<sub>2</sub> Superstructures:* The MoS<sub>2</sub> superstructures were developed via a hydrothermal preparation process. Typically, 588 mg of (NH<sub>4</sub>)<sub>6</sub>Mo<sub>7</sub>O<sub>24</sub>·4H<sub>2</sub>O and 1080 mg of thiourea were dispersed into 40 mL of deionized water with the assistance of 600 mg PVP. Then, the mixture was transferred into a 50 mL Teflon-lined stainless steel autoclave and the hydrothermal reaction was carried out at 220 °C for 18 h. The obtained precipitates were washed several times with mixed water/ethanol (v/v, 50/50) to obtain the MoS<sub>2</sub> product. The MoS<sub>2</sub> sample was dried at 80 °C for 6 h before thermal treatment in a tube furnace at 700 °C for 2 h in Ar, thus achieving the final MoS<sub>2</sub> superstructures. For FESEM observation, the MoS<sub>2</sub> sample was dispersed in DI water and dripped on silica wafer. For TEM analysis, the MoS<sub>2</sub>

superstructure was dispersed in a mixture of DI water and ethanol, and the prepared sample was loaded on copper mesh and dried at 60 °C for 20 min before observation.

*MoS<sub>2</sub> acanthospheres absorption:* Substrate with different poly C lengths (Poly-5, Poly-10, Poly-15 and Poly-20) and blocker (Substrate S for PAGE, denoted as S) were annealed from 95 °C to 4 °C at a concentration of 1 μM. The resulting Poly-5, Poly-10, Poly-15 and Poly-20 toehold exchange probes were mixed with 400 μL MoS<sub>2</sub> (500 μg ml<sup>-1</sup>) in the dark at room temperature for 3h. The samples were then washed six times by centrifugation at 12000 rpm for 10 min. The supernatant was collected and monitored by fluorophotometer to evaluate the quenching efficiency. Both the probe annealing and MoS<sub>2</sub> adsorption process were conducted in 1 × TAMg buffer.

*Target detection by the TESNA platform:* All fluorescence measurements were performed in 1×NEBuffer™ 1 (10 mM Bis-Tris-Propane-HCl, 10 mM MgCl<sub>2</sub>, 1 mM DTT, pH 7.0, diluted with 1 × TAMg buffer or complex samples human serum or cell lysate). Different concentrations of target (ranging from 1 pM to 100 nM) were incubated with the TESNA system in 100 μL 1×NEBuffer™ 1 containing 3 U mL<sup>-1</sup> Exo III for 1 h and then their fluorescence was measured with an excitation wavelength of 485 nm.

*Cell lysate preparation and biosample detection:* Human cervical carcinoma cells (HeLa) were cultured in RPMI 1640 medium which was supplemented with 10 % fetal calf serum, 100 U mL<sup>-1</sup> penicillin and 100 μg mL<sup>-1</sup> streptomycin in a humidified 5 % CO<sub>2</sub> incubator at 37 °C. HeLa cells (1×10<sup>6</sup> mL<sup>-1</sup>) were lysed via low-frequency

ultrasonic wave. To conduct the target spiking and detection analysis, the probe absorbed MoS<sub>2</sub> was added into 100  $\mu$ L 1 $\times$ NEBuffer<sup>TM</sup> 1 solution (diluted with cell lysate or human serum) containing 3 U ml<sup>-1</sup> Exo III. After different concentrations of target were added, the fluorescence was recorded after incubation for 1 h at room temperature.

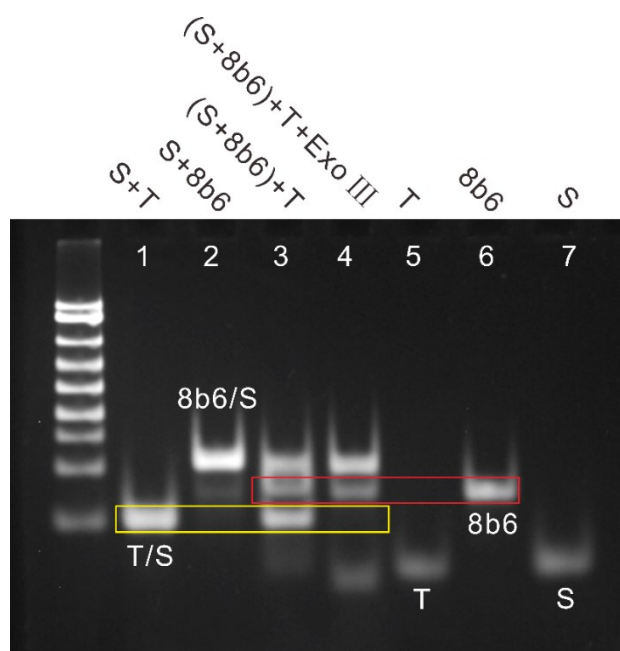

**Fig. S1** 8% native PAGE validation of toehold exchange probe-based hybridization reaction. Equivalent of substrate (Substrate S, used for PAGE, without poly C tail) and Target (T) or 8b6 at a concentration of 1  $\mu$ M were annealed from 95  $^{\circ}$ C to 4  $^{\circ}$ C in 1  $\times$  TAMg buffer to get T/S or 8b6/S duplex. Then 10  $\mu$ L 10 $\times$ NEBuffer<sup>TM</sup> 1 was mixed with 90  $\mu$ L above annealed duplex for further reaction or PAGE analysis. Lane 3: 800 nM Target was added to 8b6/S; Lane 4: 800 nM Target and 3 U mL<sup>-1</sup> Exo III were added to 8b6/S. After reaction for 30 min, the results were analyzed with 8% native PAGE. The electrophoresis was conducted in 1  $\times$  TBE buffer (89 mM Tris, 89 mM boric acid, 2 mM EDTA, pH 8.0). A constant voltage of 100 V was used for 1.5 h of electrophoresis before the gels were stained with 4S Red for imaging.

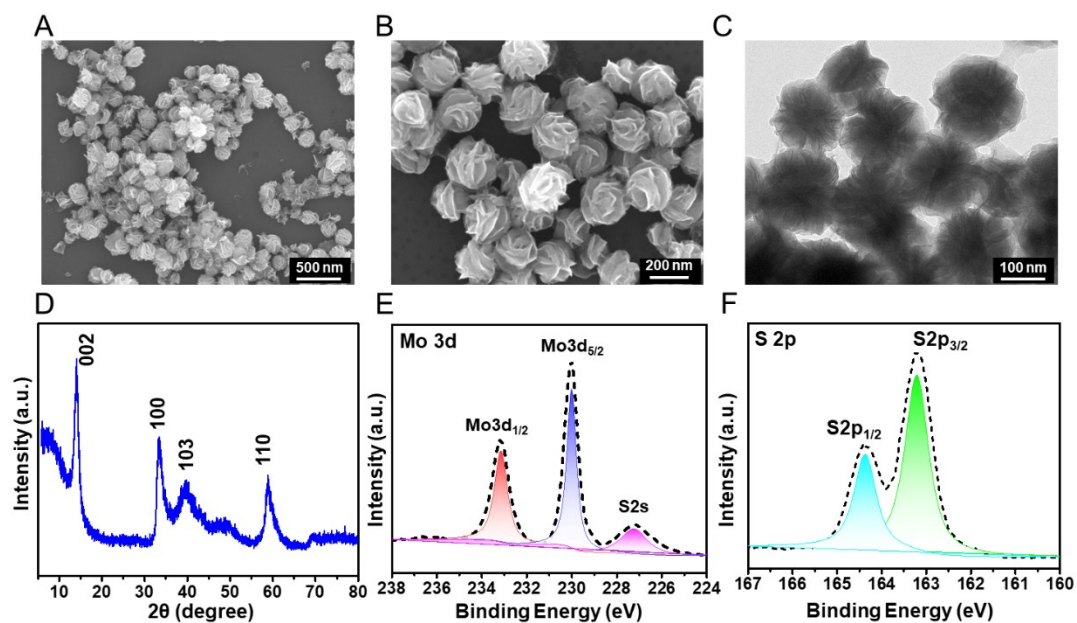

**Fig. S2** Characteristics of the MoS<sub>2</sub> superstructures. (A) and (B) SEM images at low magnifications. (C) TEM images of MoS<sub>2</sub> superstructures at low magnifications. (D) XRD pattern of the MoS<sub>2</sub> superstructures. XPS spectra of the MoS<sub>2</sub>, (E) Mo 3d, and (F) S 2p.

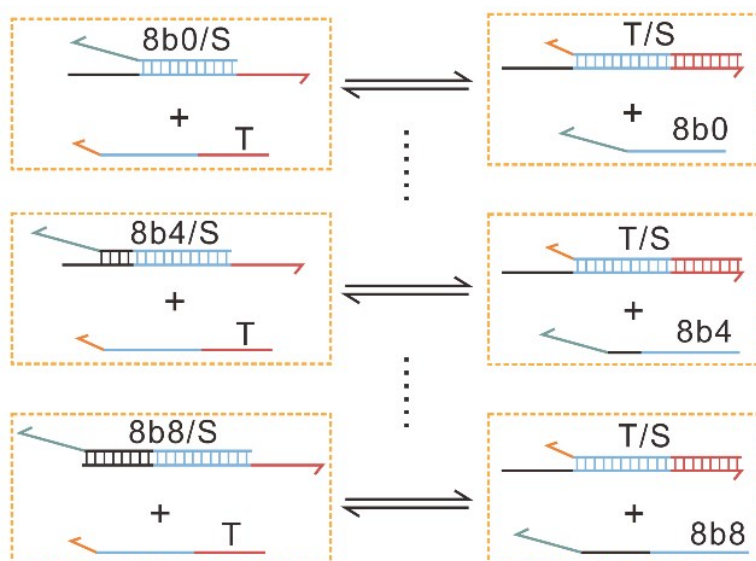

**Fig. S3** Schematic illustration of the toehold mediated strand displacement reaction process with different dissociating toehold lengths (0, 2, 4, 5, 6, 7, 8). Firstly, Equivalent of substrate strand (S, 1  $\mu$ M) was annealed with blocker (1  $\mu$ M) 8b8, 8b7, 9b6, 8b5, 8b4, 8b2, 8b0, from 95  $^{\circ}$ C to 4  $^{\circ}$ C in 1  $\times$  TAMg buffer, respectively. All the blockers used here were appended with a 36 nt poly-T tail. Then 10  $\mu$ L 10 $\times$ NEBuffer<sup>TM</sup> 1 was mixed with 90  $\mu$ L above annealed duplex for further reaction or PAGE analysis. Subsequently, we added T, M1, M5, M10, M15 and M19 to the above prefabricated toehold exchange probe system to a final concentration of 800 nM for hybridization at room temperature for 30 min. The binding of T with the initial toehold (red segment) will initiate the branch migration process, and the blocker will be released after spontaneously dissociating. T/S will be formed simultaneously. To protect target from the subsequent Exo III hydrolysis, we left a 6 nt overhang at the 3' of the T strand.



## A TENAS

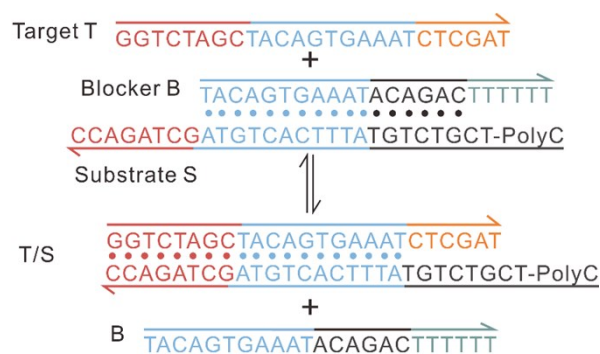

## B SSNA

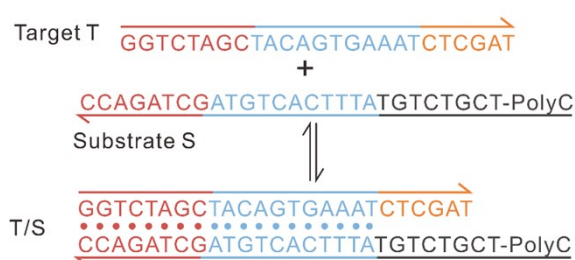

**Fig. S4** Mechanism of TESNA (A) and SSNA (B). Fluorescence measurements were performed in 1×NEBuffer™ 1 (10 mM Bis-Tris-Propane-HCl, 10 mM MgCl<sub>2</sub>, 1 mM DTT, pH 7.0, diluted with 1 × TAMg buffer) containing 3 U mL<sup>-1</sup> Exo III. Target (or spurious analogues) were incubated with the TESNA or SSVN system at a final concentration of 10 nM for 1 h and then their fluorescence was measured with an excitation wavelength of 485 nm.

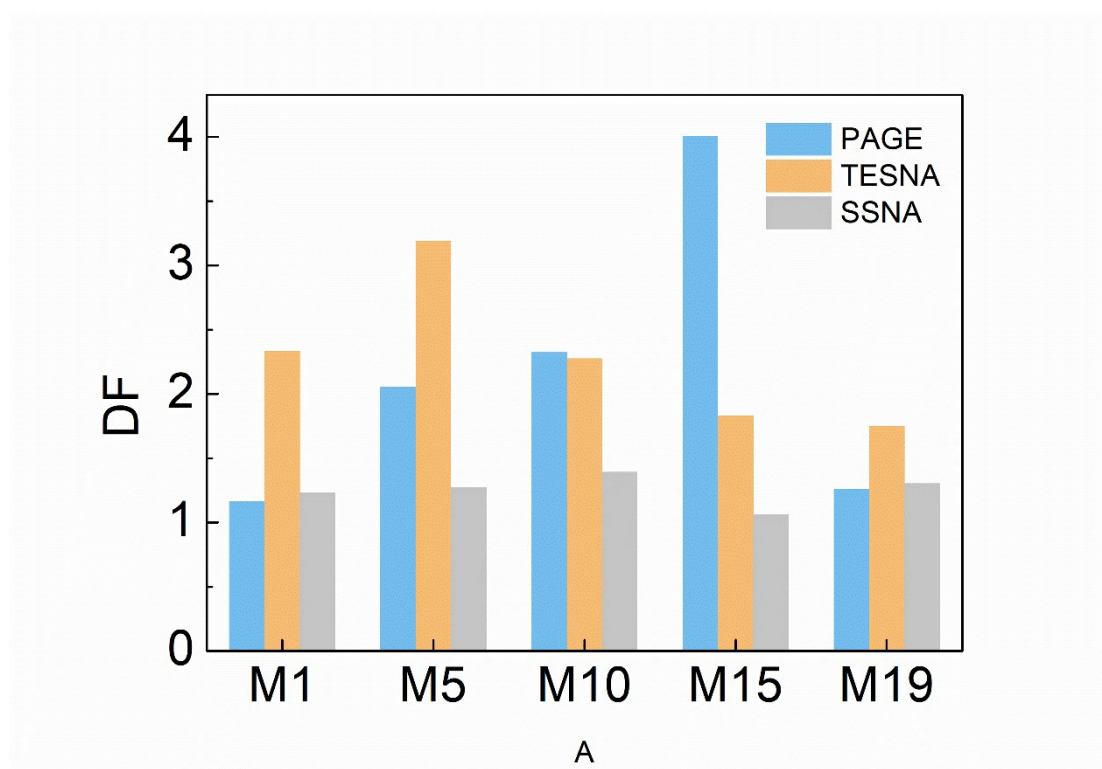

**Fig. S5** DFs for mutations at different locations across the target strand derived from PAGE (Fig. 3A), TESNA and SSNA (Fig. 4F). For both PAGE and TESNA, they showed much higher DFs for all mutations than SSNA and the highest DFs for PAGE and TESNA located in the middle (M5 and M15) of the strand. DF for PAGE were in the range of 1.16-4.00, which increased from M1 (1.16) to M15 (4.00), and then decreased for M19 (1.26). In terms of TESNA, the DFs ranged from 1.75 to 3.19 and showed better DF for mutations in the terminals of the strand (M1 and M19) than PAGE. M5 exhibited the highest DF (3.19) for TESNA.

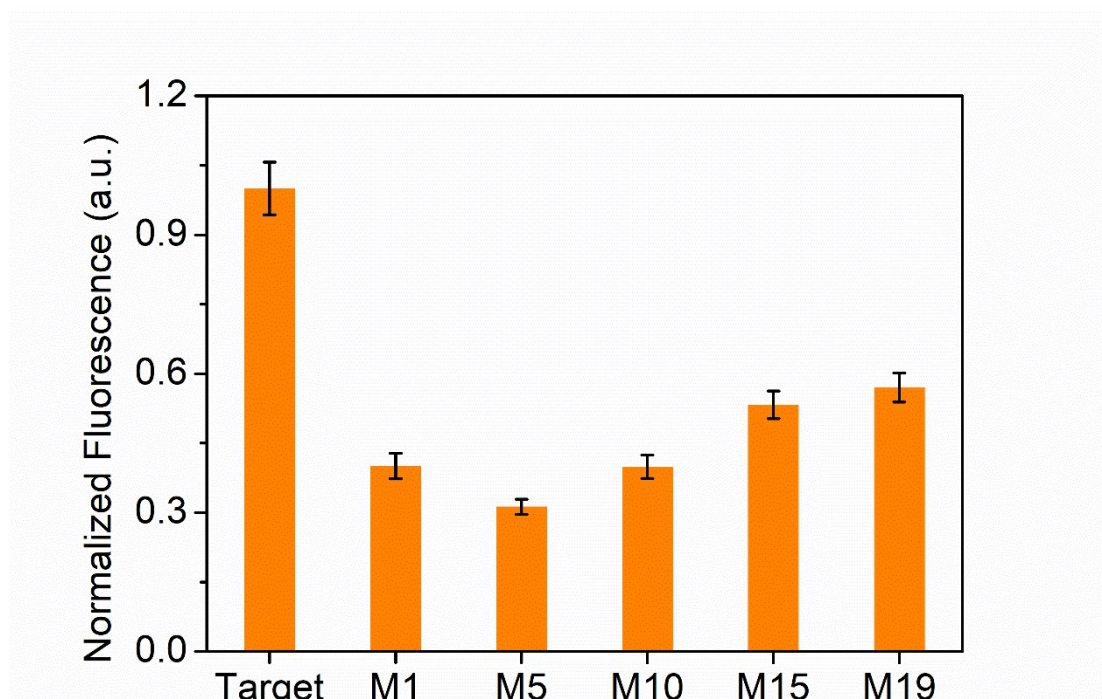

**Fig. S6** Normalized fluorescence data for target and spurious analogues via TESNA under the interference of  $0.1 \text{ mg mL}^{-1}$  herring sperm genome fragments. Fluorescence measurements were performed in  $1 \times \text{NEBuffer}^{\text{TM}} 1$  (10 mM Bis-Tris-Propane-HCl, 10 mM  $\text{MgCl}_2$ , 1 mM DTT, pH 7.0, diluted with  $1 \times \text{TAMg}$  buffer) containing  $0.1 \text{ mg mL}^{-1}$  herring sperm genome fragments and  $3 \text{ U mL}^{-1}$  Exo III. Target (or spurious analogues) were incubated with the TESNA system at a final concentration of 10 nM for 1 h and then their fluorescence was measured with an excitation wavelength of 485 nm.

**Table S1.** All the oligonucleotides used in this work.

| Name    | Sequence (5'-3')                             | Length<br>(nt) | Used in<br>Figures                     |
|---------|----------------------------------------------|----------------|----------------------------------------|
| Target  | GGTCTAGCTACAGTGAAATCTCGAT                    | 25             | Fig. 3, Fig. 4,<br>Fig. S1, Fig.<br>S6 |
| M1      | CGTCTAGCTACAGTGAAATCTCGAT                    | 25             | Fig. 3, Fig.4,<br>Fig. S6              |
| M5      | GGTCAAGCTACAGTGAAATCTCGAT                    | 25             | Fig. 3, Fig.4,<br>Fig. S6              |
| M10     | GGTCTAGCTTCAGTGAAATCTCGAT                    | 25             | Fig. 3, Fig.4,<br>Fig. S6              |
| M15     | GGTCTAGCTACAGTCAAATCTCGAT                    | 25             | Fig. 3, Fig.4,<br>Fig. S6              |
| M19     | GGTCTAGCTACAGTGAAAACCTCGAT                   | 25             | Fig. 3, Fig.4,<br>Fig. S6              |
| Poly-5  | CCCCCTCGTCTGTATTTCACTGTAGCTA<br>GACC-FAM     | 32             | Fig. 4                                 |
| Poly-10 | CCCCCCCCCTCGTCTGTATTTCACTGTA<br>GCTAGACC-FAM | 37             | Fig. 4                                 |

|                                 |                                                                 |    |                    |
|---------------------------------|-----------------------------------------------------------------|----|--------------------|
| Poly-15                         | CCCCCCCCCCCCCCCCCTCGTCTGTATTCA<br>CTGTAGCTAGACC-FAM             | 42 | Fig. 4             |
| Poly-20 (S)<br>for fluorescence | CCCCCCCCCCCCCCCCCCCCCTCGTCTGT<br>ATTTCAGTGTAGCTAGACC-FAM        | 47 | Fig. 4, Fig.<br>S6 |
| Substrate S for<br>PAGE         | TCGTCTGTATTTCAGTGTAGCTAGACC                                     | 27 | Fig. 3, Fig. S1    |
| 8b8                             | TACAGTGAAATACAGACGATTTTTTTTT<br>TTTTTTTTTTTTTTTTTTTTTTTTTTTTT   | 55 | Fig. 3             |
| 8b7                             | TACAGTGAAATACAGACGTTTTTTTTTT<br>TTTTTTTTTTTTTTTTTTTTTTTTTTTTT   | 54 | Fig. 3             |
| 8b6                             | TACAGTGAAATACAGACTTTTTTTTTTTT<br>TTTTTTTTTTTTTTTTTTTTTTTTTTTTT  | 53 | Fig. 3, Fig. S1    |
| 8b5                             | TACAGTGAAATACAGATTTTTTTTTTTTT<br>TTTTTTTTTTTTTTTTTTTTTTTTTTTTT  | 52 | Fig. 3             |
| 8b4                             | TACAGTGAAATACAGTTTTTTTTTTTTTT<br>TTTTTTTTTTTTTTTTTTTTTTTTTTTTT  | 51 | Fig. 3             |
| 8b2                             | TACAGTGAAATACTTTTTTTTTTTTTTTT<br>TTTTTTTTTTTTTTTTTTTTTTTTTTTTT  | 49 | Fig. 3             |
| 8b0                             | TACAGTGAAATTTTTTTTTTTTTTTTTTTT<br>TTTTTTTTTTTTTTTTTTTTTTTTTTTTT | 47 | Fig. 3             |
| Blocker                         | TACAGTGAAATACAGACTTTTTTT                                        | 19 | Fig. 4, Fig. S6    |

**Table S2.** Standard addition analysis in human serum and cell lysate samples.

| <b>Sample</b> | <b>Added (pM)</b> | <b>Detected <sup>a</sup> (pM)</b> | <b>Recovery (%)</b> |
|---------------|-------------------|-----------------------------------|---------------------|
| Cell lysate   | 300               | 323 ± 45                          | 107.7               |
|               | 800               | 755 ± 82                          | 94.4                |
| Human serum   | 300               | 330 ± 32                          | 110.0               |
|               | 800               | 869 ± 77                          | 108.6               |

<sup>a</sup> Values represented mean ± SD (n = 3).
